# Supplementary material for: IGFL2-AS1, a Long Non-Coding RNA, Is Associated with Radioresistance in Colorectal Cancer
Source: Int J Mol Sci. 2023 Jan 4;24(2):978. doi: 10.3390/ijms24020978 (PMC9866146; doi:10.3390/ijms24020978)
Supplement: Supplementary file 1 [file ijms-24-00978-s001.zip › Supplementary figures.pdf]

Supplementary figures

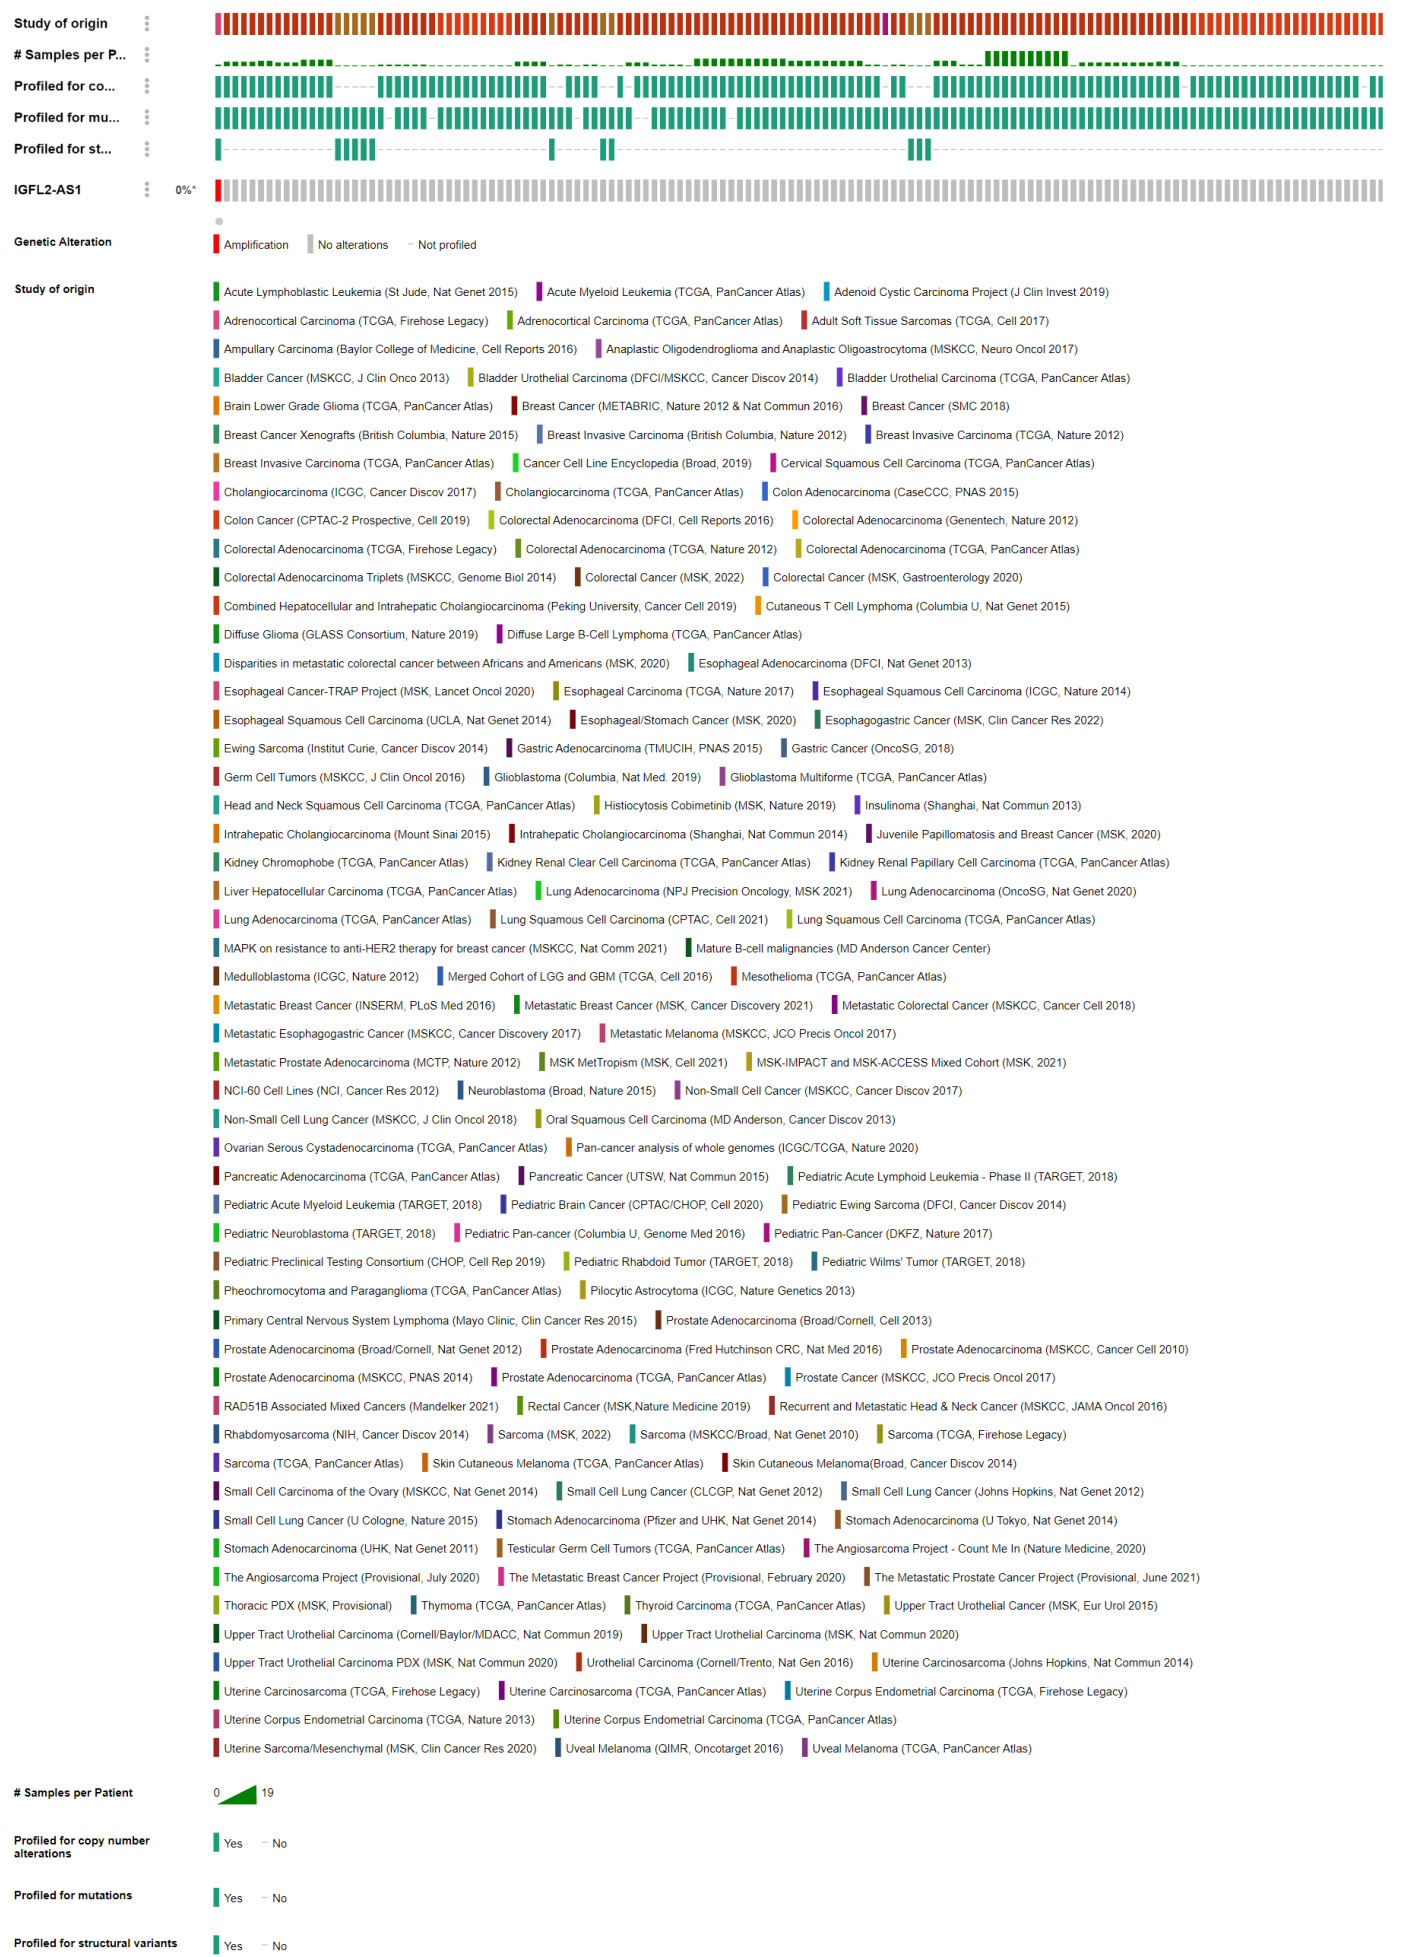

**Figure S1.** Candidate gene validation and genetic alterations in cancers. The candidate gene was queried for genetic alterations across 153 different cancer studies (<http://cbiportal.org/> accessed December 20, 2022). Genetic alterations are depicted graphically and color coded: amplification, red; no alterations, gray.

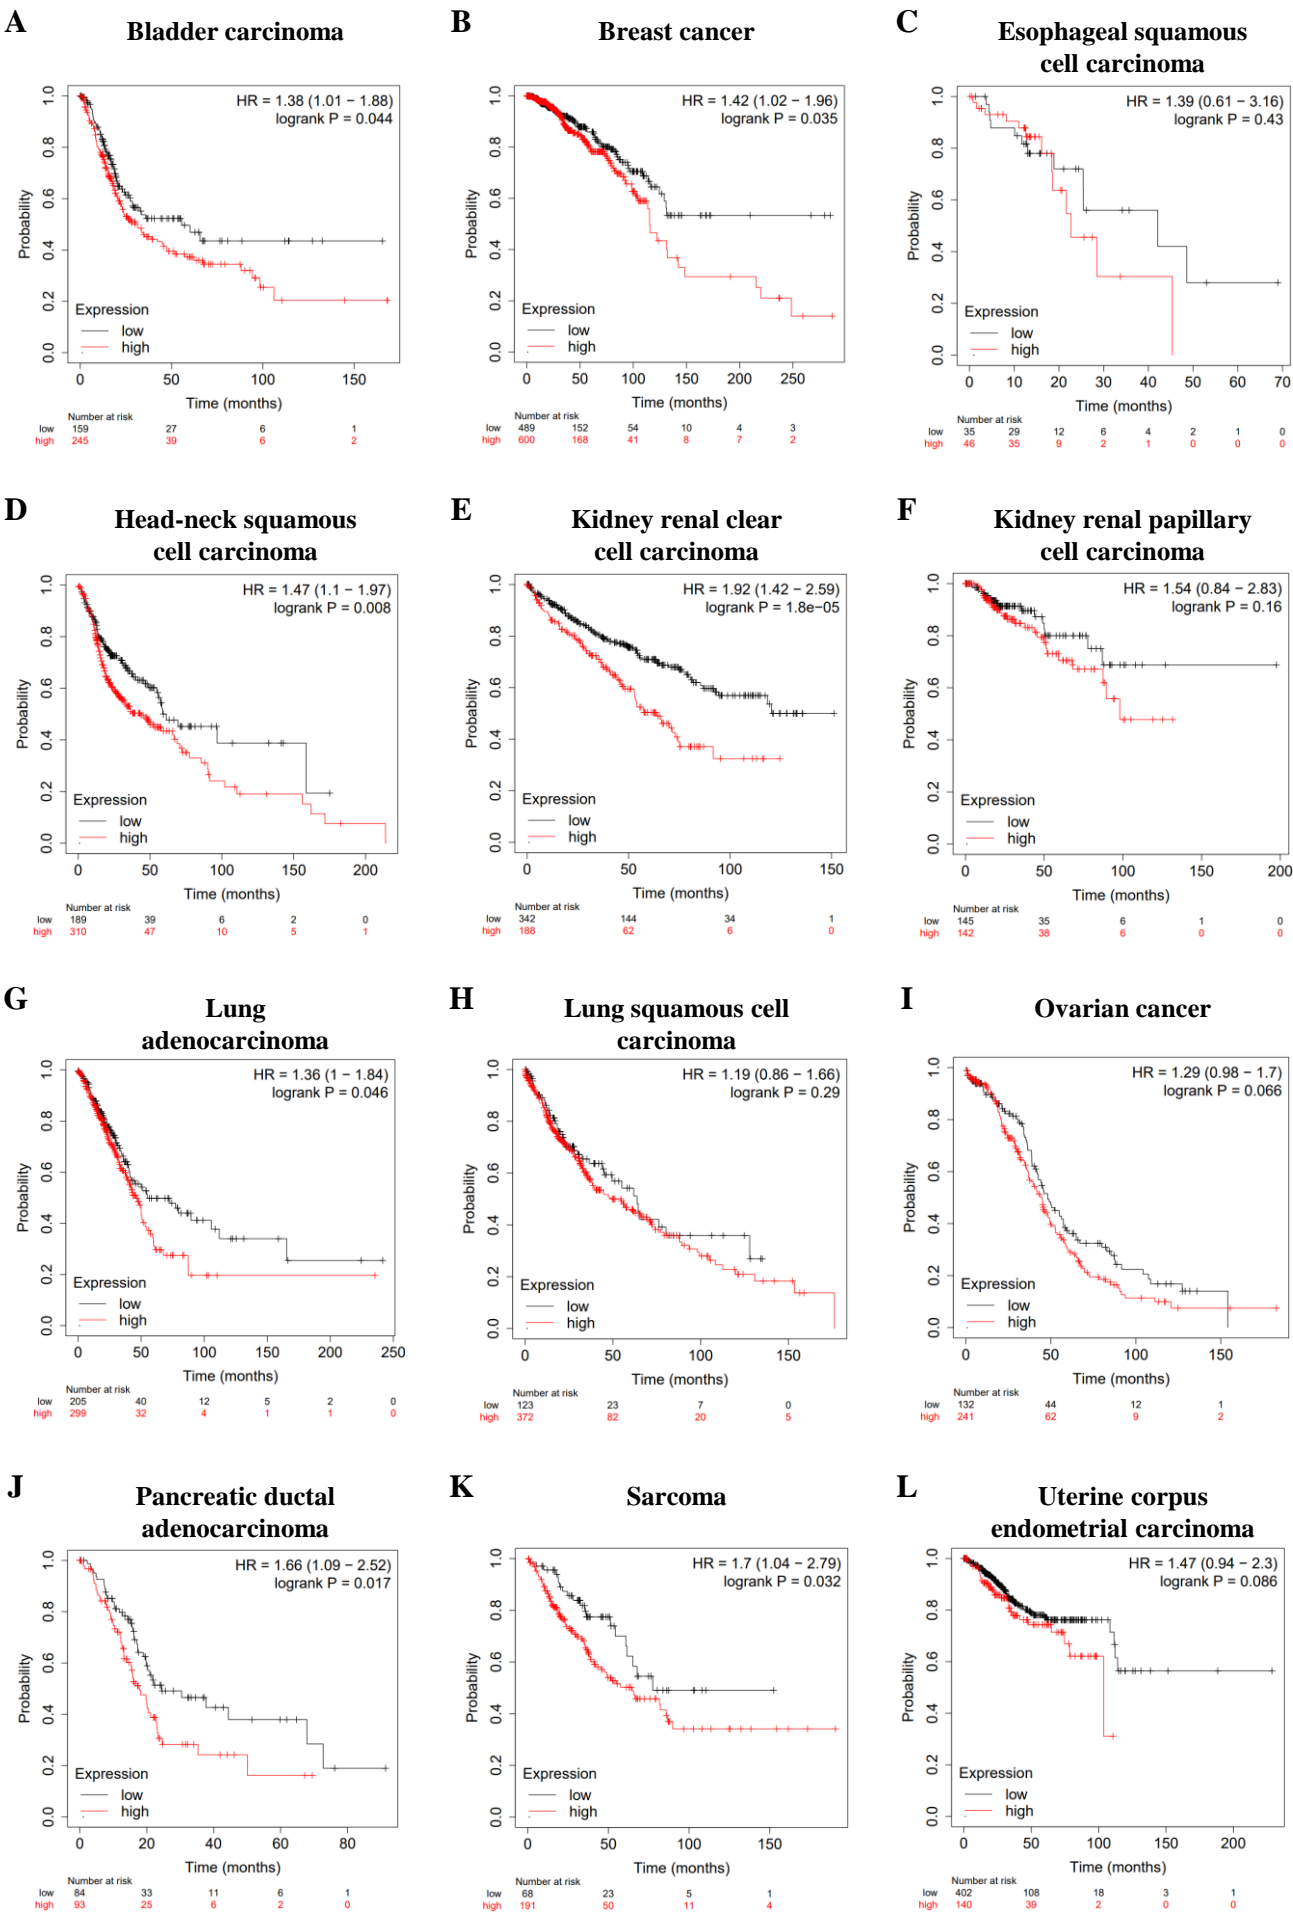

**Figure S2.** Overall survival (OS) analysis of IGFL2-AS1 genes. OS analysis of IGFL2-AS1 genes was performed using the Kaplan-Meier method with a log-rank statistical test. The patients were categorized into a high-expression group (red) and a low-expression group (black) according to the median or upper quartile expression level of IGFL2-AS1 as indicated. High expression groups exhibited significant associations with poor OS time in patients with (A) bladder carcinoma, (B) breast cancer, (C) esophageal squamous cell carcinoma, (D) head-neck squamous cell carcinoma, (E) kidney renal clear cell carcinoma, (F) kidney renal papillary cell carcinoma, (G) lung adenocarcinoma, (H) lung squamous cell carcinoma, (I) ovarian cancer, (J) pancreatic ductal adenocarcinoma, (K) sarcoma, and (L) uterine corpus endometrial carcinoma.

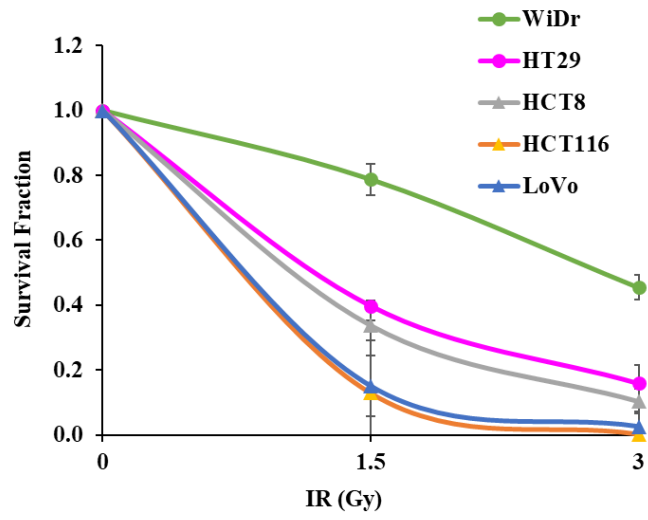

**Figure S3.** Clonogenic assay of CRC cell lines after irradiating with doses of 0, 1.5 and 3 Gy (n = 3 independent experiments). Colonies were obtained on the 14th day after irradiation and the results are expressed as surviving fraction. Data are normalized to those of non-irradiated controls and are presented as means  $\pm$  SD.

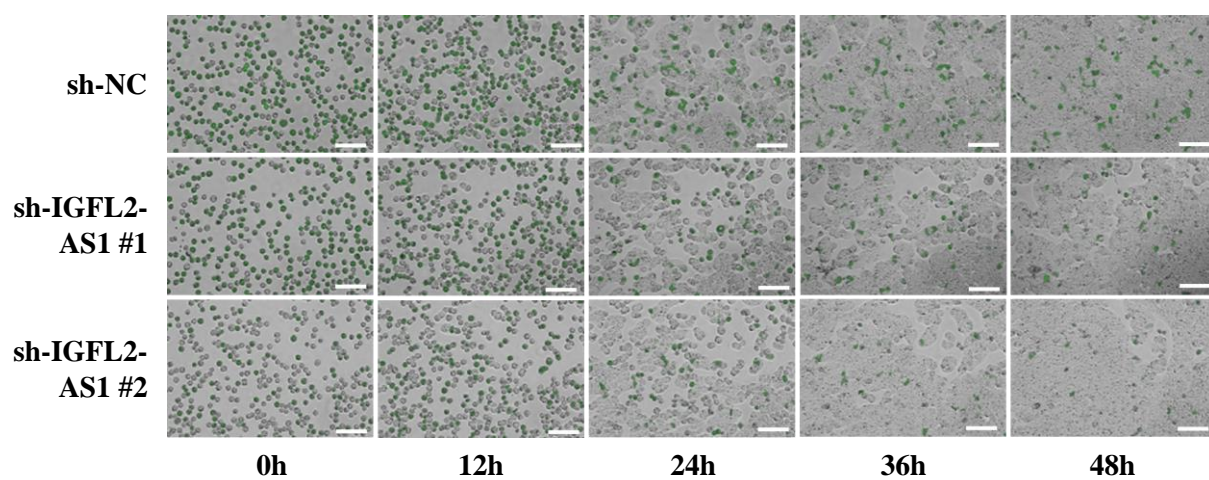

**Figure S4.** Time-lapse images of IGFL2-AS1–transfected CRC cell lines. Proliferation of the indicated cell lines was measured using a Celloger Mini Plus time-lapse microscopy system. Representative time-lapse images of the indicated cell lines at 0, 12, 24, 36, and 48 hours are shown. Scale bars, 200  $\mu\text{m}$ .

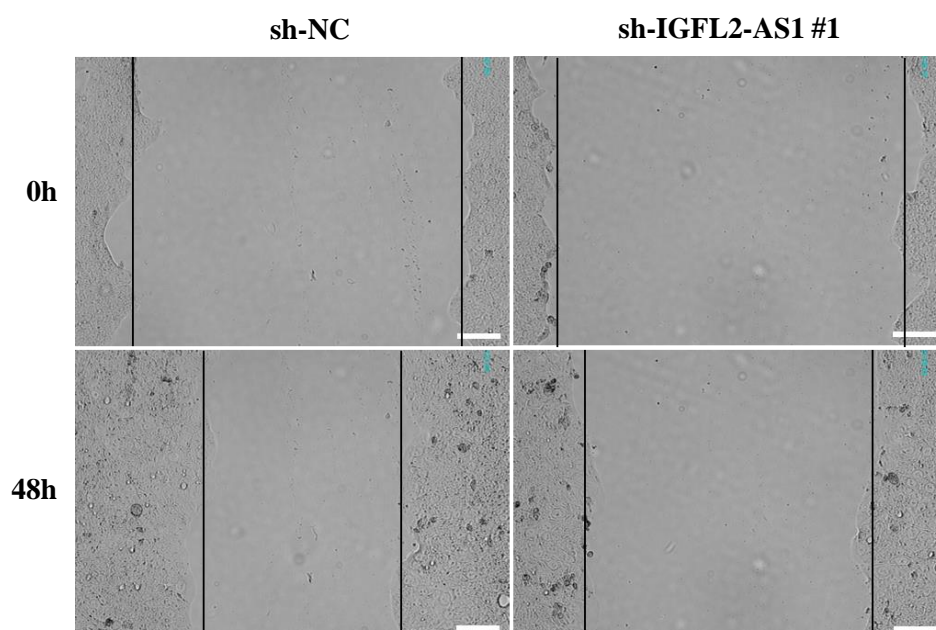

**Figure S5.** Images of wound healing in IGFL2-AS1–transfected CRC cell lines. Wound-healing assays in the indicated cell lines, performed using a Celloger Mini Plus time-lapse microscopy system. Representative time-lapse images of wound-healing assays obtained over a 48-h period after scratching (at 0 hour) are shown. Scale bars, 200  $\mu\text{m}$ .

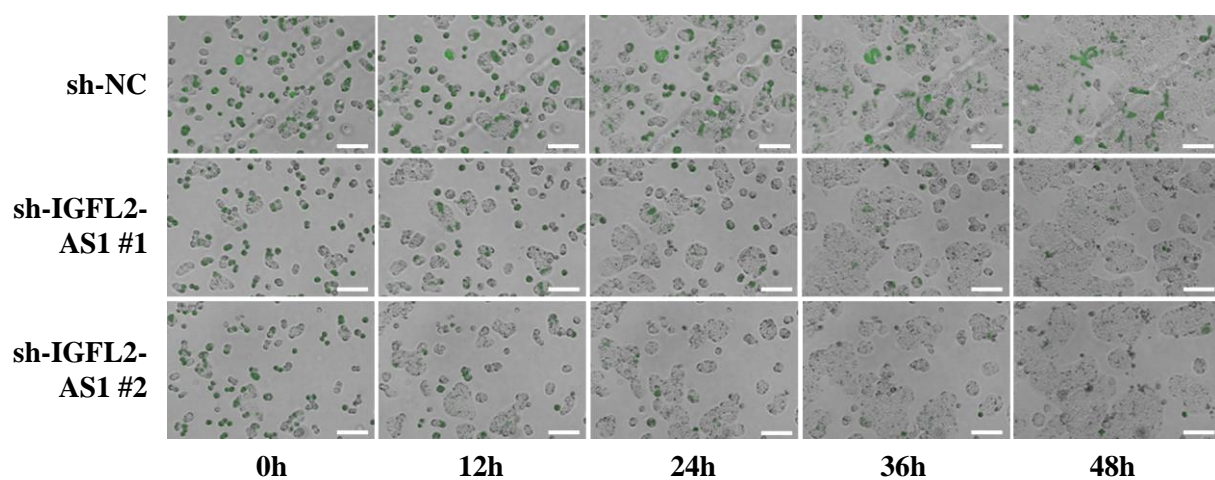

**Figure S6.** Time-lapse images of IGFL2-AS1–transfected CRC cells following irradiation. Proliferation of the indicated cell lines after irradiation at a dose of 3 Gy, measured using a Celloger Mini Plus time-lapse microscopy system. Representative time-lapse images of the indicated cell lines at 0, 12, 24, 36, and 48 hours are shown. Scale bars, 200  $\mu\text{m}$ .

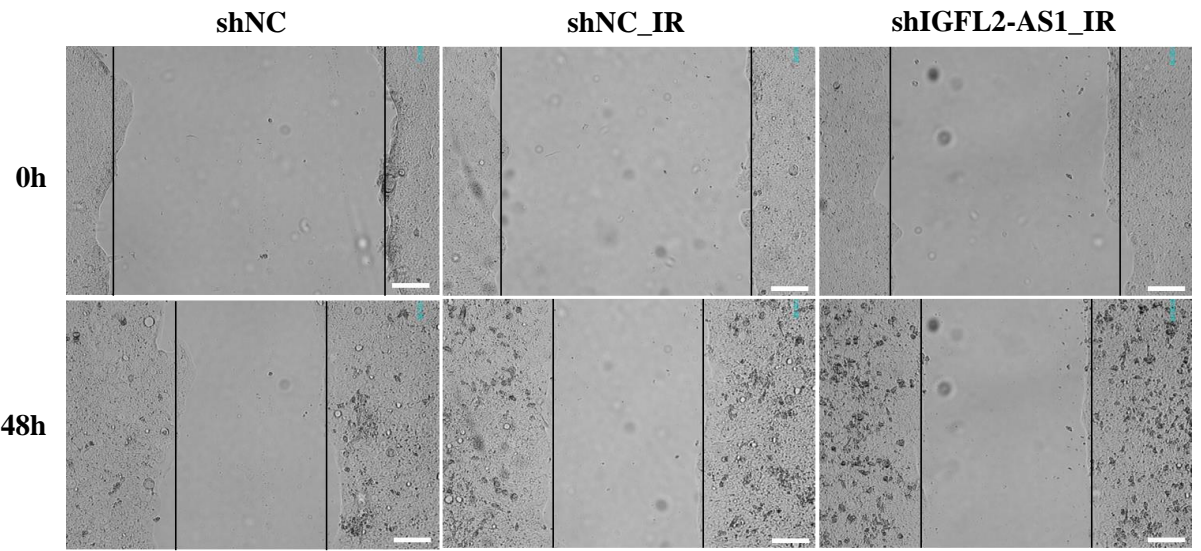

**Figure S7.** Images of wound healing in IGFL2-AS1–transfected CRC cells following irradiation. Wound-healing assays of the indicated cell lines after irradiation at a dose of 3 Gy were performed using a Celloger Mini Plus time-lapse microscopy system. Representative time-lapse images of wound-healing assays obtained over a 48 hours period after scratching (at 0 hour) are shown. Scale bars, 200  $\mu\text{m}$ .

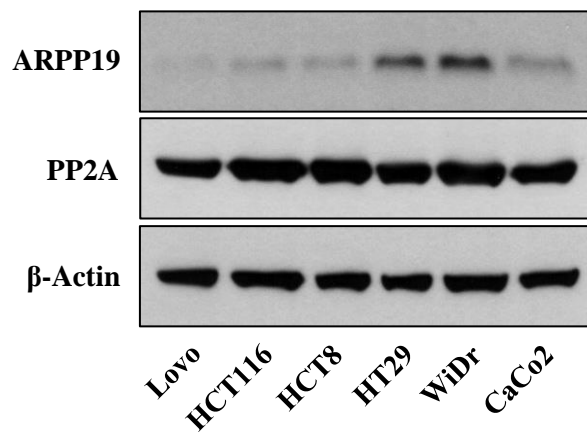

**Figure S8.** Western blot analysis of ARPP19 and PP2A expression in CRC cell lines.  $\beta$ -actin was used as a loading control.
