# Supplementary material for: IGFL2-AS1, a Long Non-Coding RNA, Is Associated with Radioresistance in Colorectal Cancer
Source: Int J Mol Sci. 2023 Jan 4;24(2):978. doi: 10.3390/ijms24020978 (PMC9866146; doi:10.3390/ijms24020978)
Supplement: Supplementary file 1 [file ijms-24-00978-s001.zip › Table S1 Patients (Final).pdf]

**Table S1. Association between IGFL2-AS1 and clinical features**

| <b>Sample No.</b>           | <b>RR-1</b> | <b>RR-2</b> | <b>RR-3</b> | <b>RS-1</b> | <b>RS-2</b> | <b>RS-3</b> |
|-----------------------------|-------------|-------------|-------------|-------------|-------------|-------------|
| <b>Sex</b>                  | M           | M           | F           | M           | M           | F           |
| <b>Age (years)</b>          | 77          | 71          | 76          | 49          | 64          | 62          |
| <b>Clinical stage</b>       | T3N+        | T3N+        | T3N+        | T3N+        | T2N+        | T3N+        |
| <b>Regression</b>           | Minimal     | Minimal     | Minimal     | Complete    | Complete    | Complete    |
| <b>ypStage</b>              | T3N1M0      | T3N1M0      | T3N0M0      | T0N0M0      | T0N0M0      | T0N0M0      |
| <b>IGFL2-AS1 Expression</b> | 4.2         | 0.5         | 3.4         | 0.3         | 0.3         | 0.2         |

Abbreviation: ypStage, pathologic stage after neoadjuvant treatment at surgical specimen.
